# Supplementary material for: Comparative larval morphology of four Pteroptyx (Coleoptera, Lampyridae, Luciolinae) species in Thailand
Source: PeerJ. 2025 Apr 1;13:e19190. doi: 10.7717/peerj.19190 (PMC11970419; doi:10.7717/peerj.19190)
Supplement: Supplemental Information 5 [file peerj-13-19190-s005.xlsx]

## Sheet: Measurement
BL	BW	PL	PW	L:W	DP-I	DP-II	DP-III	DP-IV	DP-V	Species			Unit of length = mm
					0.224	0.222	0.214	0.179	0.285	PT			PT = Pteroptyx tener
					0.266	0.221	0.189	0.239	0.301	PT			PA = Pteroptyx asymmetria
					0.227	0.222	0.179	0.231	0.304	PT			PM = Pteroptyx malaccae
7.35	1.67	1.01	0.948	1.0654	0.273	0.229	0.224	0.25	0.331	PT			PV = Pteroptyx valida
7.74	1.52	0.911	0.899	1.01335	0.275	0.246	0.202	0.182	0.315	PT
8.34	1.76	1.2	1.04	1.15385	0.319	0.284	0.271	0.23	0.393	PT			Measurements
7.83	1.84	1.15	1.02	1.12745	0.333	0.357	0.208	0.197	0.345	PT
7.51	1.64	1.12	0.931	1.20301	0.301	0.272	0.136	0.288	0.4	PT
8.02	1.84	1.09	0.99	1.10101	0.358	0.324	0.253	0.162	0.367	PT
7.87	1.75	1.18	1.06	1.11321	0.302	0.286	0.234	0.22	0.382	PT
7.48	1.63	0.872	0.877	0.994299	0.297	0.207	0.218	0.145	0.306	PT
7.93	1.64	1.14	0.989	1.15268	0.349	0.267	0.196	0.202	0.406	PT
8.41	1.6	1.31	0.969	1.35191	0.287	0.237	0.359	0.366	0.346	PA
6.84	1.42	1.06	0.84	1.2619	0.202	0.203	0.323	0.226	0.338	PA
6.86	1.41	0.908	0.838	1.08353	0.252	0.198	0.244	0.172	0.279	PA
					0.21	0.174	0.279	0.216	0.297	PA
6.71	1.31	0.767	0.733	1.04638	0.237	0.173	0.225	0.242	0.286	PA
7.33	1.45	1.26	0.878	1.43508	0.255	0.206	0.284	0.317	0.321	PA
7.72	1.39	1.33	0.901	1.47614	0.307	0.223	0.363	0.363	0.417	PA
7.58	1.58	1.01	0.821	1.23021	0.257	0.232	0.279	0.274	0.316	PA
7.92	1.56	1.24	0.885	1.40113	0.267	0.204	0.302	0.307	0.355	PA
					0.202	0.138	0.257	0.214	0.255	PA
8.09	1.69	1.3	0.988	1.31579	0.275	0.197	0.349	0.346	0.378	PA
6.97	1.49	1.17	0.929	1.25942	0.266	0.205	0.305	0.288	0.315	PA
8.83	1.94	1.45	1.21	1.19835	0.344	0.275	0.395	0.373	0.462	PM
9.11	1.78	1.42	1.03	1.37864	0.3	0.29	0.28	0.339	0.43	PM
9.54	1.91	1.39	1.11	1.25225	0.293	0.291	0.295	0.316	0.406	PM
8.38	1.79	1.29	1.04	1.24038	0.346	0.273	0.279	0.29	0.398	PM
8.97	1.92	1.25	1.12	1.11607	0.381	0.363	0.235	0.234	0.388	PM
	2.01	1.58	1.23	1.28455	0.356	0.363	0.323	0.403	0.434	PM
8.82	2.03	1.39	1.15	1.2087	0.323	0.293	0.239	0.337	0.386	PM
					0.285	0.25	0.184	0.302	0.354	PM
9.39	1.85	1.36	1.11	1.22523	0.394	0.217	0.272	0.367	0.409	PM
8.97	1.78	1.32	1.11	1.18919	0.345	0.286	0.267	0.359	0.368	PM
					0.306	0.305	0.266	0.294	0.421	PM
12.28	2.51	1.25	1.13	1.10619						PV
10.74	1.99	1.6	1.37	1.16788						PV
12.12	2.51	1.69	1.53	1.10458						PV
11.17	2.54	1.8	1.53	1.17647						PV
10.43	2.27	1.41	1.29	1.09302						PV
9.97	2.2	1.49	1.39	1.07194						PV
9.9	1.98	1.46	1.31	1.1145						PV
11.96	2.31	1.76	1.52	1.15789						PV
11.18	2.49									PV
9.67	1.83									PV
11	2.34									PV
8.18	1.69									PV
